# Supplementary material
Source: Research Square preprint supplement (doi:10.21203/rs.3.rs-9176515/v1)
Supplement: Supplementary file 1 [file 398bf327c156775b800a9245.docx]

|  | A1 | A2 | A3 | A4 | A5 | A6 | A7 | A8 | A9 | A10 | A11 | A12 | D1 | D2 | D3 | D4 | D5 | D6 | D7 | D8 | D9 | D10 |
| --- | --- | --- | --- | --- | --- | --- | --- | --- | --- | --- | --- | --- | --- | --- | --- | --- | --- | --- | --- | --- | --- | --- |
| A1 | 0.000 | 0.100 | 0.061 | 0.100 | 0.052 | 0.058 | 0.091 | 0.093 | 0.069 | 0.019 | 0.033 | 0.040 | 0.034 | 0.109 | 0.009 | 0.000 | 0.066 | 0.000 | 0.082 | 0.000 | -0.068 | 0.000 |
| A2 | 0.064 | 0.000 | 0.000 | 0.000 | 0.043 | 0.000 | 0.079 | 0.084 | 0.078 | 0.000 | 0.015 | 0.019 | 0.000 | 0.000 | 0.000 | 0.000 | 0.027 | 0.068 | 0.046 | 0.000 | 0.000 | 0.118 |
| A3 | 0.022 | 0.019 | 0.000 | -0.032 | 0.000 | 0.000 | 0.000 | 0.034 | 0.016 | 0.000 | 0.001 | -0.009 | -0.128 | 0.008 | 0.000 | 0.000 | 0.000 | 0.000 | 0.000 | -0.067 | 0.000 | -0.122 |
| A4 | 0.087 | 0.050 | 0.000 | 0.000 | 0.032 | 0.024 | 0.009 | 0.000 | 0.009 | 0.000 | 0.034 | 0.000 | 0.034 | 0.033 | 0.012 | 0.000 | 0.000 | 0.075 | 0.023 | 0.015 | 0.000 | 0.079 |
| A5 | 0.018 | 0.020 | -0.002 | 0.046 | 0.000 | 0.015 | 0.032 | 0.023 | 0.000 | 0.003 | 0.000 | 0.000 | 0.023 | 0.002 | 0.042 | 0.040 | 0.000 | 0.086 | 0.037 | 0.024 | 0.000 | 0.000 |
| A6 | 0.047 | 0.004 | 0.000 | 0.047 | 0.053 | 0.000 | 0.019 | 0.000 | 0.046 | 0.012 | 0.058 | 0.027 | 0.130 | 0.094 | 0.000 | 0.000 | 0.062 | 0.100 | 0.027 | 0.000 | 0.025 | 0.091 |
| A7 | 0.038 | 0.077 | 0.025 | 0.063 | 0.065 | 0.015 | 0.000 | 0.098 | 0.048 | 0.011 | 0.013 | 0.029 | 0.000 | 0.000 | 0.000 | 0.000 | 0.000 | 0.204 | 0.106 | 0.063 | 0.007 | 0.062 |
| A8 | 0.089 | 0.112 | 0.054 | 0.022 | 0.055 | 0.038 | 0.136 | 0.000 | 0.074 | 0.054 | 0.000 | 0.052 | 0.000 | 0.000 | 0.000 | 0.000 | -0.047 | 0.000 | 0.000 | 0.000 | 0.000 | 0.000 |
| A9 | 0.030 | 0.058 | 0.010 | 0.043 | 0.034 | 0.025 | 0.061 | 0.110 | 0.000 | 0.049 | 0.012 | 0.054 | 0.000 | 0.059 | 0.000 | 0.097 | 0.000 | 0.049 | 0.087 | 0.000 | 0.000 | 0.000 |
| A10 | 0.000 | 0.000 | 0.007 | 0.007 | 0.000 | -0.010 | 0.000 | 0.000 | 0.000 | 0.000 | 0.000 | 0.002 | 0.020 | 0.034 | 0.000 | 0.031 | 0.074 | 0.025 | 0.061 | 0.000 | 0.000 | 0.000 |
| A11 | 0.000 | 0.021 | 0.016 | 0.013 | 0.000 | 0.034 | 0.014 | 0.034 | 0.000 | 0.005 | 0.000 | 0.043 | 0.088 | 0.059 | 0.038 | 0.093 | 0.093 | 0.000 | 0.000 | 0.080 | 0.000 | 0.064 |
| A12 | 0.005 | 0.016 | 0.007 | 0.000 | 0.001 | 0.017 | 0.048 | 0.020 | 0.052 | 0.028 | 0.041 | 0.000 | 0.119 | 0.057 | 0.056 | 0.003 | 0.119 | 0.044 | 0.122 | 0.092 | 0.121 | 0.062 |
| D1 | 0.003 | 0.008 | 0.002 | 0.005 | 0.002 | 0.000 | 0.006 | 0.000 | 0.000 | 0.002 | 0.000 | 0.006 | 0.000 | 0.065 | 0.107 | 0.031 | 0.051 | 0.042 | 0.050 | 0.023 | 0.001 | 0.052 |
| D2 | 0.002 | 0.002 | 0.000 | 0.003 | 0.007 | 0.001 | 0.001 | 0.000 | 0.000 | 0.000 | 0.001 | 0.000 | 0.048 | 0.000 | 0.022 | 0.050 | 0.046 | 0.051 | 0.066 | 0.023 | 0.000 | 0.060 |
| D3 | 0.000 | 0.000 | 0.000 | 0.000 | 0.000 | 0.005 | 0.000 | 0.001 | 0.000 | 0.000 | 0.000 | 0.000 | 0.042 | 0.008 | 0.000 | 0.044 | 0.032 | 0.035 | 0.015 | 0.018 | 0.006 | 0.034 |
| D4 | 0.000 | 0.000 | 0.000 | 0.000 | 0.001 | 0.000 | 0.000 | -0.002 | 0.000 | -0.007 | 0.003 | 0.003 | 0.026 | 0.052 | 0.035 | 0.000 | 0.056 | 0.042 | 0.043 | 0.005 | -0.016 | 0.004 |
| D5 | 0.001 | 0.002 | 0.001 | 0.006 | 0.003 | 0.004 | 0.016 | 0.008 | 0.000 | 0.000 | 0.004 | 0.009 | 0.042 | 0.009 | 0.033 | 0.000 | 0.000 | 0.063 | 0.000 | 0.024 | 0.000 | 0.000 |
| D6 | 0.006 | 0.005 | 0.000 | 0.005 | 0.018 | 0.001 | 0.020 | 0.010 | 0.009 | 0.007 | 0.003 | 0.012 | 0.092 | 0.030 | 0.033 | 0.031 | 0.085 | 0.000 | 0.060 | 0.025 | 0.025 | 0.020 |
| D7 | 0.007 | 0.005 | 0.000 | 0.006 | 0.007 | 0.004 | 0.006 | 0.000 | 0.000 | 0.006 | 0.002 | 0.000 | 0.038 | 0.078 | 0.042 | 0.041 | 0.012 | 0.032 | 0.000 | 0.000 | 0.061 | 0.056 |
| D8 | 0.000 | 0.000 | 0.003 | 0.001 | 0.006 | 0.001 | 0.007 | 0.003 | 0.000 | 0.001 | 0.005 | 0.002 | 0.047 | 0.031 | 0.049 | 0.016 | 0.027 | 0.036 | 0.022 | 0.000 | 0.000 | 0.016 |
| D9 | 0.000 | 0.008 | 0.000 | 0.005 | 0.003 | 0.001 | 0.006 | 0.001 | 0.000 | 0.001 | 0.000 | 0.003 | 0.030 | 0.014 | 0.000 | 0.000 | 0.016 | 0.023 | 0.015 | 0.000 | 0.000 | 0.088 |
| D10 | 0.000 | 0.000 | 0.002 | 0.000 | 0.006 | 0.002 | 0.005 | 0.006 | 0.004 | 0.000 | 0.004 | 0.002 | 0.083 | 0.046 | 0.099 | 0.018 | 0.071 | 0.046 | 0.039 | 0.034 | 0.070 | 0.000 |

**Table s1.** Longitudinal network correlation matrix between activities of daily living (ADL) and CESD-10 items in Chinese older adults

**Table s2.** Cross-Lagged Association Coefficients (β values) for the all-Specific ADL-Depression Network

|  | nodeOut | nodeIn | value |
| --- | --- | --- | --- |
| 1 | A7: Housework | D6: Effortfulness | 0.204053071999719 |
| 2 | A8: Cooking | A7: Housework | 0.136321621583782 |
| 3 | A6: Controlling elimination | D1: Depressiveness | 0.129688646064176 |
| 4 | A12: Money management | D7: Inertia | 0.122167647539922 |
| 5 | A12: Money management | D9: Hopelessness | 0.121392920619545 |
| 6 | A12: Money management | D5: Cognitive trouble | 0.118963430498279 |
| 7 | A12: Money management | D1: Depressiveness | 0.118953299556345 |
| 8 | A2: Bathing | D10: Unhappiness | 0.118281287074691 |
| 9 | A8: Cooking | A2: Bathing | 0.111613618944547 |
| 10 | A9: Shopping | A8: Cooking | 0.110270801614892 |
| 11 | A1: Dressing | D2: Loneliness | 0.108623054657786 |
| 12 | D1: Depressiveness | D3: Botheredness | 0.107134659867384 |
| 13 | A7: Housework | D7: Inertia | 0.106222930911064 |
| 14 | A1: Dressing | A4: Getting up | 0.100297601459376 |
| 15 | A6: Controlling elimination | D6: Effortfulness | 0.100047742515641 |
| 16 | A1: Dressing | A2: Bathing | 0.0997939924478307 |
| 17 | D10: Unhappiness | D3: Botheredness | 0.0990216182630635 |
| 18 | A7: Housework | A8: Cooking | 0.0981513737872629 |
| 19 | A9: Shopping | D4: Fearfulness | 0.0973225757153541 |
| 20 | A6: Controlling elimination | D2: Loneliness | 0.0941579167411861 |
| 21 | A11: Medication | D5: Cognitive trouble | 0.0932485352355095 |
| 22 | A11: Medication | D4: Fearfulness | 0.0930299619347159 |
| 23 | A1: Dressing | A8: Cooking | 0.0927821366895221 |
| 24 | D6: Effortfulness | D1: Depressiveness | 0.092462499127182 |
| 25 | A12: Money management | D8: Restlessness | 0.0924464048654948 |
| 26 | A1: Dressing | A7: Housework | 0.0912789443477927 |
| 27 | A6: Controlling elimination | D10: Unhappiness | 0.0907852490495755 |
| 28 | A8: Cooking | A1: Dressing | 0.0885579900998977 |
| 29 | D9: Hopelessness | D10: Unhappiness | 0.0882454595649823 |
| 30 | A11: Medication | D1: Depressiveness | 0.0875851709010569 |
| 31 | A9: Shopping | D7: Inertia | 0.0872667618711793 |
| 32 | A4: Getting up | A1: Dressing | 0.0866246729198824 |
| 33 | A5: Toileting | D6: Effortfulness | 0.0855698202795396 |
| 34 | D6: Effortfulness | D5: Cognitive trouble | 0.0850096230275044 |
| 35 | A2: Bathing | A8: Cooking | 0.0839762155017966 |
| 36 | D10: Unhappiness | D1: Depressiveness | 0.0829094794352228 |
| 37 | A1: Dressing | D7: Inertia | 0.081638503100278 |
| 38 | A11: Medication | D8: Restlessness | 0.0795269743875588 |
| 39 | A2: Bathing | A7: Housework | 0.0790852289983476 |
| 40 | A4: Getting up | D10: Unhappiness | 0.0789003251808533 |
| 41 | A2: Bathing | A9: Shopping | 0.0783395936896107 |
| 42 | D7: Inertia | D2: Loneliness | 0.07818847660318 |
| 43 | A7: Housework | A2: Bathing | 0.0769084009633753 |
| 44 | A4: Getting up | D6: Effortfulness | 0.0753744856364169 |
| 45 | A8: Cooking | A9: Shopping | 0.0742671768819579 |
| 46 | A10: Phone use | D5: Cognitive trouble | 0.0736052388691315 |
| 47 | D10: Unhappiness | D5: Cognitive trouble | 0.0713145166265354 |
| 48 | D10: Unhappiness | D9: Hopelessness | 0.0701795603251903 |
| 49 | A1: Dressing | A9: Shopping | 0.0693540125099811 |
| 50 | A2: Bathing | D6: Effortfulness | 0.0682867099955402 |

**Table s3.** Unstandardized In-Expected Influence and Out-Expected Influence for All Nodes in the Cross-Lagged Panel Network (Total Sample)

|  | **in-EI** | **out-EI** |
| --- | --- | --- |
| A1: Dressing | 0.417160575957613 | 0.947380032873572 |
| A2: Bathing | 0.506714142526191 | 0.641650515571573 |
| A3: Eating | 0.186113387644252 | -0.259067786 |
| A4: Getting up | 0.340714144284498 | 0.514612196116938 |
| A5: Toiletin | 0.38833171780541 | 0.407576113198383 |
| A6: Controlling elimination | 0.236652398141332 | 0.841437471886433 |
| A7: Housework | 0.55728680593496 | 0.924444277286802 |
| A8: Cooking | 0.522286033813583 | 0.639208669576474 |
| A9: Shopping | 0.405892156719961 | 0.778927477047313 |
| A10: Phone use | 0.190971633386076 | 0.251372401859306 |
| A11: Medication | 0.228680271420954 | 0.694581285350256 |
| A12: Money management | 0.294254966334412 | 1.03352631090823 |
| D1: depressiveness | 0.766350106286463 | 0.45531670277127 |
| D2: loneliness | 0.788129547667399 | 0.383959436690351 |
| D3: botheredness | 0.579444665885317 | 0.239614951769339 |
| D4: fearfulness | 0.494442168772395 | 0.244066144671341 |
| D5: cognitive trouble | 0.791118731464979 | 0.226395885364602 |
| D6: effortfulness | 1.02323408157569 | 0.499393548546362 |
| D7: inertia | 0.90175906493308 | 0.404265544026448 |
| D8: restlessness | 0.35861984776575 | 0.275294342557031 |
| D9: hopelessness | 0.231829117294152 | 0.213860981935789 |
| D10: unhappiness | 0.684980532783813 | 0.537149594046986 |

**Table s4.** Longitudinal network correlation matrix between activities of daily living (ADL) and CESD-10 items in Chinese female older adults

|  | A1 | A2 | A3 | A4 | A5 | A6 | A7 | A8 | A9 | A10 | A11 | A12 | D1 | D2 | D3 | D4 | D5 | D6 | D7 | D8 | D9 | D10 |
| --- | --- | --- | --- | --- | --- | --- | --- | --- | --- | --- | --- | --- | --- | --- | --- | --- | --- | --- | --- | --- | --- | --- |
| A1 | 0.000 | 0.066 | 0.050 | 0.121 | 0.043 | 0.044 | 0.108 | 0.131 | 0.058 | 0.036 | 0.079 | 0.040 | 0.000 | 0.040 | 0.000 | 0.000 | 0.000 | 0.000 | 0.039 | 0.013 | -0.050 | 0.090 |
| A2 | 0.042 | 0.000 | 0.000 | 0.000 | 0.005 | 0.028 | 0.042 | 0.060 | 0.087 | 0.020 | 0.001 | 0.014 | 0.000 | 0.022 | 0.000 | 0.000 | 0.000 | 0.078 | 0.011 | 0.021 | 0.000 | 0.012 |
| A3 | 0.095 | 0.127 | 0.000 | 0.000 | 0.000 | 0.000 | 0.000 | 0.025 | 0.050 | 0.000 | 0.056 | 0.015 | -0.104 | 0.051 | 0.000 | 0.000 | 0.000 | 0.000 | 0.000 | 0.000 | 0.000 | -0.099 |
| A4 | 0.091 | 0.033 | 0.000 | 0.000 | 0.043 | 0.000 | 0.025 | 0.000 | 0.000 | 0.000 | 0.016 | 0.000 | 0.052 | 0.109 | 0.034 | 0.063 | 0.026 | 0.086 | 0.151 | 0.026 | 0.000 | 0.110 |
| A5 | 0.027 | 0.021 | -0.001 | 0.023 | 0.000 | 0.000 | 0.002 | 0.013 | 0.004 | 0.000 | 0.005 | 0.003 | 0.000 | 0.000 | 0.020 | 0.051 | 0.000 | 0.079 | 0.022 | 0.000 | 0.032 | 0.001 |
| A6 | 0.042 | 0.024 | 0.000 | 0.093 | 0.113 | 0.000 | 0.027 | 0.000 | 0.055 | 0.000 | 0.072 | 0.027 | 0.155 | 0.005 | 0.000 | 0.000 | 0.078 | 0.090 | 0.057 | 0.000 | 0.000 | 0.057 |
| A7 | 0.000 | 0.041 | 0.002 | 0.056 | 0.044 | 0.023 | 0.000 | 0.050 | 0.011 | 0.000 | 0.007 | 0.023 | 0.000 | 0.000 | 0.000 | 0.001 | 0.000 | 0.107 | 0.005 | 0.091 | 0.000 | 0.007 |
| A8 | 0.104 | 0.143 | 0.078 | 0.043 | 0.088 | 0.051 | 0.182 | 0.000 | 0.102 | 0.059 | 0.009 | 0.077 | -0.041 | 0.000 | -0.069 | 0.000 | 0.000 | 0.041 | 0.000 | 0.000 | 0.000 | 0.000 |
| A9 | 0.012 | 0.063 | 0.019 | 0.013 | 0.009 | 0.027 | 0.034 | 0.106 | 0.000 | 0.042 | 0.012 | 0.046 | 0.000 | 0.034 | 0.000 | 0.119 | 0.000 | 0.026 | 0.185 | 0.000 | 0.000 | 0.056 |
| A10 | 0.035 | 0.032 | 0.000 | 0.021 | 0.000 | 0.000 | 0.001 | 0.001 | 0.000 | 0.000 | 0.000 | 0.000 | 0.007 | 0.068 | 0.000 | 0.073 | 0.000 | 0.035 | 0.140 | 0.015 | 0.000 | 0.000 |
| A11 | 0.000 | 0.000 | 0.005 | 0.000 | 0.000 | 0.008 | 0.000 | 0.001 | 0.000 | 0.000 | 0.000 | 0.049 | 0.053 | 0.000 | 0.000 | 0.000 | 0.030 | 0.000 | 0.000 | 0.033 | 0.000 | 0.047 |
| A12 | 0.000 | 0.000 | 0.000 | 0.000 | 0.000 | 0.000 | 0.035 | 0.005 | 0.040 | 0.025 | 0.028 | 0.000 | 0.060 | 0.000 | 0.060 | 0.015 | 0.150 | 0.010 | 0.093 | 0.060 | 0.013 | -0.003 |
| D1 | 0.006 | 0.001 | 0.000 | 0.000 | 0.000 | 0.000 | 0.003 | 0.000 | 0.000 | 0.009 | 0.000 | 0.007 | 0.000 | 0.067 | 0.106 | 0.042 | 0.043 | 0.036 | 0.062 | 0.021 | 0.000 | 0.041 |
| D2 | 0.003 | 0.007 | 0.000 | 0.004 | 0.007 | 0.006 | 0.000 | 0.000 | 0.000 | 0.000 | 0.000 | -0.002 | 0.072 | 0.000 | 0.006 | 0.059 | 0.023 | 0.050 | 0.085 | 0.020 | 0.000 | 0.046 |
| D3 | 0.002 | 0.000 | 0.001 | 0.001 | 0.000 | 0.003 | 0.000 | 0.005 | 0.000 | 0.000 | 0.000 | 0.000 | 0.011 | 0.000 | 0.000 | 0.020 | 0.017 | 0.000 | 0.021 | 0.000 | 0.002 | 0.046 |
| D4 | 0.003 | 0.001 | 0.000 | 0.005 | 0.006 | 0.000 | 0.009 | 0.000 | 0.000 | 0.000 | 0.005 | 0.009 | 0.040 | 0.060 | 0.030 | 0.000 | 0.059 | 0.048 | 0.050 | 0.006 | 0.000 | 0.021 |
| D5 | 0.000 | 0.005 | 0.000 | 0.009 | 0.001 | 0.007 | 0.019 | 0.003 | 0.000 | 0.001 | 0.006 | 0.009 | 0.037 | 0.000 | 0.016 | 0.002 | 0.000 | 0.065 | 0.000 | 0.000 | 0.000 | -0.021 |
| D6 | 0.003 | 0.004 | 0.001 | 0.005 | 0.024 | 0.000 | 0.028 | 0.013 | 0.012 | 0.003 | 0.006 | 0.011 | 0.087 | 0.015 | 0.081 | 0.016 | 0.091 | 0.000 | 0.047 | 0.038 | 0.022 | 0.047 |
| D7 | 0.000 | 0.000 | 0.000 | 0.005 | 0.000 | 0.000 | 0.000 | 0.000 | 0.000 | 0.000 | 0.002 | -0.001 | 0.016 | 0.069 | 0.048 | 0.051 | 0.017 | 0.043 | 0.000 | 0.000 | 0.024 | 0.028 |
| D8 | 0.002 | 0.001 | 0.001 | 0.004 | 0.005 | 0.000 | 0.012 | 0.007 | 0.000 | 0.000 | 0.006 | 0.003 | 0.033 | 0.020 | 0.068 | 0.032 | 0.042 | 0.041 | 0.017 | 0.000 | 0.000 | 0.013 |
| D9 | 0.000 | 0.008 | 0.000 | 0.003 | 0.000 | 0.000 | 0.004 | 0.004 | 0.000 | 0.002 | 0.003 | 0.008 | 0.044 | 0.031 | 0.010 | 0.000 | 0.034 | 0.038 | 0.020 | 0.006 | 0.000 | 0.094 |
| D10 | 0.000 | 0.000 | 0.000 | 0.000 | 0.000 | 0.000 | 0.001 | 0.000 | 0.004 | 0.000 | 0.002 | 0.000 | 0.083 | 0.052 | 0.102 | 0.038 | 0.054 | 0.035 | 0.034 | 0.017 | 0.083 | 0.000 |

**Table s5.** Longitudinal network correlation matrix between activities of daily living (ADL) and CESD-10 items in Chinese male older adults

|  | A1 | A2 | A3 | A4 | A5 | A6 | A7 | A8 | A9 | A10 | A11 | A12 | D1 | D2 | D3 | D4 | D5 | D6 | D7 | D8 | D9 | D10 |
| --- | --- | --- | --- | --- | --- | --- | --- | --- | --- | --- | --- | --- | --- | --- | --- | --- | --- | --- | --- | --- | --- | --- |
| A1 | 0.000 | 0.082 | 0.011 | 0.056 | 0.044 | 0.025 | 0.023 | 0.003 | 0.086 | 0.000 | 0.000 | 0.067 | 0.138 | 0.132 | 0.089 | 0.000 | 0.000 | 0.000 | 0.018 | 0.000 | -0.020 | 0.000 |
| A2 | 0.087 | 0.000 | 0.000 | 0.016 | 0.062 | 0.000 | 0.147 | 0.116 | 0.020 | 0.000 | 0.026 | 0.000 | 0.000 | 0.000 | 0.000 | 0.000 | 0.072 | 0.087 | 0.105 | 0.000 | 0.005 | 0.245 |
| A3 | -0.030 | 0.000 | 0.000 | 0.000 | 0.000 | -0.013 | 0.028 | 0.019 | 0.019 | 0.000 | 0.000 | -0.059 | -0.130 | 0.000 | 0.000 | 0.000 | 0.000 | 0.000 | 0.000 | 0.000 | 0.000 | -0.061 |
| A4 | 0.068 | 0.058 | 0.022 | 0.000 | 0.032 | 0.074 | 0.023 | 0.019 | 0.047 | 0.008 | 0.028 | 0.029 | 0.010 | 0.000 | 0.000 | 0.000 | 0.000 | 0.099 | 0.000 | 0.000 | 0.000 | 0.031 |
| A5 | 0.000 | 0.000 | 0.011 | 0.059 | 0.000 | 0.069 | 0.046 | 0.034 | 0.006 | 0.019 | 0.000 | 0.000 | 0.054 | 0.013 | 0.073 | 0.000 | 0.000 | 0.006 | 0.080 | 0.000 | -0.076 | 0.000 |
| A6 | 0.046 | 0.007 | 0.021 | 0.004 | 0.021 | 0.000 | 0.000 | 0.000 | 0.000 | 0.000 | 0.038 | 0.038 | 0.094 | 0.004 | 0.000 | 0.000 | 0.016 | 0.160 | 0.000 | 0.000 | 0.000 | 0.076 |
| A7 | 0.065 | 0.110 | 0.041 | 0.011 | 0.090 | 0.028 | 0.000 | 0.171 | 0.075 | 0.014 | 0.006 | 0.027 | 0.000 | 0.015 | 0.000 | 0.000 | 0.038 | 0.324 | 0.216 | 0.000 | 0.123 | 0.000 |
| A8 | 0.107 | 0.083 | 0.024 | 0.033 | 0.011 | 0.000 | 0.079 | 0.000 | 0.050 | 0.027 | 0.000 | 0.017 | 0.058 | 0.082 | 0.000 | 0.000 | 0.000 | 0.033 | 0.000 | 0.000 | 0.013 | 0.020 |
| A9 | 0.035 | 0.044 | 0.020 | 0.063 | 0.055 | 0.085 | 0.103 | 0.112 | 0.000 | 0.021 | 0.021 | 0.104 | 0.000 | 0.000 | 0.000 | 0.062 | 0.091 | 0.000 | 0.016 | 0.174 | 0.000 | 0.000 |
| A10 | -0.039 | -0.011 | 0.013 | 0.000 | 0.000 | -0.043 | 0.000 | -0.019 | 0.000 | 0.000 | 0.026 | 0.009 | 0.072 | 0.010 | 0.000 | 0.000 | 0.148 | 0.037 | 0.040 | 0.000 | 0.000 | -0.084 |
| A11 | 0.000 | 0.062 | 0.059 | 0.019 | 0.000 | 0.034 | 0.011 | 0.111 | 0.000 | 0.000 | 0.000 | 0.015 | 0.023 | 0.174 | 0.071 | 0.007 | 0.000 | 0.000 | 0.000 | 0.000 | 0.099 | 0.135 |
| A12 | 0.051 | 0.075 | 0.022 | 0.031 | 0.015 | 0.040 | 0.060 | 0.021 | 0.062 | 0.016 | 0.045 | 0.000 | 0.141 | 0.142 | 0.071 | 0.000 | 0.000 | 0.085 | 0.052 | 0.027 | 0.194 | 0.193 |
| D1 | 0.000 | 0.010 | 0.002 | 0.008 | 0.002 | 0.008 | 0.000 | 0.003 | 0.000 | 0.000 | 0.000 | 0.002 | 0.000 | 0.048 | 0.076 | 0.012 | 0.047 | 0.012 | 0.000 | 0.000 | 0.000 | 0.059 |
| D2 | 0.000 | 0.000 | 0.000 | 0.000 | 0.004 | 0.000 | 0.008 | 0.006 | 0.000 | 0.000 | 0.005 | 0.016 | 0.021 | 0.000 | 0.060 | 0.036 | 0.057 | 0.028 | 0.026 | 0.011 | 0.000 | 0.062 |
| D3 | 0.000 | 0.000 | 0.000 | 0.000 | 0.007 | 0.004 | 0.000 | 0.000 | 0.000 | 0.000 | 0.000 | 0.002 | 0.081 | 0.037 | 0.000 | 0.026 | 0.020 | 0.060 | 0.026 | 0.017 | 0.007 | 0.019 |
| D4 | 0.000 | -0.008 | -0.003 | 0.000 | 0.000 | 0.000 | 0.000 | -0.008 | -0.006 | 0.000 | 0.000 | 0.000 | 0.017 | 0.018 | 0.023 | 0.000 | 0.018 | 0.025 | 0.063 | 0.000 | -0.004 | 0.000 |
| D5 | 0.000 | 0.000 | 0.006 | 0.000 | 0.007 | 0.001 | 0.008 | 0.008 | 0.002 | 0.000 | 0.005 | 0.006 | 0.055 | 0.030 | 0.078 | 0.011 | 0.000 | 0.096 | 0.000 | 0.056 | 0.000 | 0.012 |
| D6 | 0.011 | 0.001 | 0.000 | 0.000 | 0.003 | 0.000 | 0.008 | 0.001 | 0.006 | 0.000 | 0.000 | 0.011 | 0.132 | 0.048 | 0.022 | 0.050 | 0.084 | 0.000 | 0.109 | 0.043 | 0.022 | 0.020 |
| D7 | 0.013 | 0.019 | 0.000 | 0.004 | 0.013 | 0.005 | 0.021 | 0.002 | 0.000 | 0.000 | 0.000 | -0.006 | 0.063 | 0.082 | 0.018 | 0.044 | 0.007 | 0.017 | 0.000 | 0.000 | 0.053 | 0.062 |
| D8 | 0.000 | 0.000 | 0.003 | 0.000 | 0.005 | 0.000 | 0.000 | 0.000 | 0.000 | 0.000 | 0.001 | 0.000 | 0.048 | 0.037 | 0.019 | 0.007 | 0.021 | 0.028 | 0.023 | 0.000 | 0.000 | 0.015 |
| D9 | 0.000 | 0.005 | 0.000 | 0.003 | 0.010 | 0.002 | 0.001 | 0.000 | 0.000 | 0.000 | 0.000 | 0.004 | 0.021 | 0.007 | 0.000 | 0.000 | 0.000 | 0.022 | 0.011 | 0.000 | 0.000 | 0.075 |
| D10 | 0.004 | 0.003 | 0.005 | 0.000 | 0.003 | 0.004 | 0.005 | 0.011 | 0.000 | 0.000 | 0.000 | 0.004 | 0.068 | 0.026 | 0.075 | 0.004 | 0.068 | 0.042 | 0.030 | 0.042 | 0.063 | 0.000 |

**Table s6.** Cross-Lagged Association Coefficients (β values) for the Female-Specific ADL-Depression Network

|  | nodeOut | nodeIn | value |
| --- | --- | --- | --- |
| 1 | A9: Shopping | D7: Inertia | 0.185000752471383 |
| 2 | A8: Cooking | A7: Housework | 0.181562078031146 |
| 3 | A6: Controlling elimination | D1: Depressiveness | 0.155124764934125 |
| 4 | A4: Getting up | D7: Inertia | 0.151458281305369 |
| 5 | A12: Money management | D5: Cognitive trouble | 0.15009836631007 |
| 6 | A8: Cooking | A2: Bathing | 0.142841769386808 |
| 7 | A10: Phone use | D7: Inertia | 0.140129172736094 |
| 8 | A1: Dressing | A8: Cooking | 0.130917795599985 |
| 9 | A3: Eating | A2: Bathing | 0.127240881840579 |
| 10 | A1: Dressing | A4: Getting up | 0.121356037068777 |
| 11 | A9: Shopping | D4: Fearfulness | 0.118866671108661 |
| 12 | A6: Controlling elimination | A5: Toileting | 0.112603682360081 |
| 13 | A4: Getting up | D10: Unhappiness | 0.109778833852199 |
| 14 | A4: Getting up | D2: Loneliness | 0.10861502234771 |
| 15 | A1: Dressing | A7: Housework | 0.107555794897148 |
| 16 | A7: Housework | D6: Effortfulness | 0.106745246852654 |
| 17 | D1: Depressiveness | D3: Botheredness | 0.106227768066238 |
| 18 | A9: Shopping | A8: Cooking | 0.105572011464607 |
| 19 | A8: Cooking | A1: Dressing | 0.104307492765027 |
| 20 | D10: Unhappiness | D3: Botheredness | 0.102257345123638 |
| 21 | A8: Cooking | A9: Shopping | 0.101602024938865 |
| 22 | A3: Eating | A1: Dressing | 0.0952235668715564 |
| 23 | D9: Hopelessness | D10: Unhappiness | 0.0944476384888144 |
| 24 | A12: Money management | D7: Inertia | 0.0934913153071161 |
| 25 | A6: Controlling elimination | A4: Getting up | 0.0933207462360839 |
| 26 | A4: Getting up | A1: Dressing | 0.0913420905512601 |
| 27 | D6: Effortfulness | D5: Cognitive trouble | 0.0908365917753297 |
| 28 | A7: Housework | D8: Restlessness | 0.090777649059958 |
| 29 | A6: Controlling elimination | D6: Effortfulness | 0.0901780391269188 |
| 30 | A1: Dressing | D10: Unhappiness | 0.0895011301965321 |
| 31 | A8: Cooking | A5: Toileting | 0.0876586964836767 |
| 32 | D6: Effortfulness | D1: Depressiveness | 0.0874366607610151 |
| 33 | A2: Bathing | A9: Shopping | 0.0869372434689128 |
| 34 | A4: Getting up | D6: Effortfulness | 0.085968663317441 |
| 35 | D2: Loneliness | D7: Inertia | 0.0853117558802134 |
| 36 | D10: Unhappiness | D9: Hopelessness | 0.0832905038337014 |
| 37 | D10: Unhappiness | D1: Depressiveness | 0.0832394300754128 |
| 38 | D6: Effortfulness | D3: Botheredness | 0.0805544922077186 |
| 39 | A1: Dressing | A11: Medication | 0.0790831100453986 |
| 40 | A5: Toileting | D6: Effortfulness | 0.0785767713929745 |

**Table s7.** Cross-Lagged Association Coefficients (β values) for the male-Specific ADL-Depression Network

|  | nodeOut | nodeIn | value |
| --- | --- | --- | --- |
| 1 | A7: Housework | D6: Effortfulness | 0.324477185916156 |
| 2 | A2: Bathing | D10: Unhappiness | 0.244959228731319 |
| 3 | A7: Housework | D7: Inertia | 0.21590313686262 |
| 4 | A12: Money management | D9: Hopelessness | 0.194124403580064 |
| 5 | A12: Money management | D10: Unhappiness | 0.192840515967664 |
| 6 | A9: Shopping | D8: Restlessness | 0.174333408224227 |
| 7 | A11: Medication | D2: Loneliness | 0.174262251343934 |
| 8 | A7: Housework | A8: Cooking | 0.170567566129116 |
| 9 | A6: Controlling elimination | D6: Effortfulness | 0.159661777836663 |
| 10 | A10: Phone use | D5: Cognitive trouble | 0.147874768984843 |
| 11 | A2: Bathing | A7: Housework | 0.14749706231007 |
| 12 | A12: Money management | D2: Loneliness | 0.141728144705092 |
| 13 | A12: Money management | D1: Depressiveness | 0.141258899975764 |
| 14 | A1: Dressing | D1: Depressiveness | 0.137563600786122 |
| 15 | A11: Medication | D10: Unhappiness | 0.134741092084473 |
| 16 | D6: Effortfulness | D1: Depressiveness | 0.131728927872711 |
| 17 | A1: Dressing | D2: Loneliness | 0.131600473056117 |
| 18 | A7: Housework | D9: Hopelessness | 0.122954332518356 |
| 19 | A2: Bathing | A8: Cooking | 0.116247525099451 |
| 20 | A9: Shopping | A8: Cooking | 0.1116005919634 |
| 21 | A11: Medication | A8: Cooking | 0.110971193682134 |
| 22 | A7: Housework | A2: Bathing | 0.110292143231401 |
| 23 | D6: Effortfulness | D7: Inertia | 0.108621423386935 |
| 24 | A8: Cooking | A1: Dressing | 0.106891595510733 |
| 25 | A2: Bathing | D7: Inertia | 0.104894968466054 |
| 26 | A9: Shopping | A12: Money management | 0.104407406801276 |
| 27 | A9: Shopping | A7: Housework | 0.102630510308283 |
| 28 | A11: Medication | D9: Hopelessness | 0.0992853960775519 |
| 29 | A4: Getting up | D6: Effortfulness | 0.0988502994002058 |
| 30 | D5: Cognitive trouble | D6: Effortfulness | 0.0955309586911479 |
| 31 | A6: Controlling elimination | D1: Depressiveness | 0.0944402103398316 |
| 32 | A9: Shopping | D5: Cognitive trouble | 0.0908797557284418 |
| 33 | A7: Housework | A5: Toileting | 0.0895107977224962 |
| 34 | A1: Dressing | D3: Botheredness | 0.0893518641950365 |
| 35 | A2: Bathing | A1: Dressing | 0.0874427935197571 |
| 36 | A2: Bathing | D6: Effortfulness | 0.0866006716081544 |
| 37 | A1: Dressing | A9: Shopping | 0.0855585174712073 |
| 38 | A9: Shopping | A6: Controlling elimination | 0.084690854883999 |
| 39 | A12: Money management | D6: Effortfulness | 0.0845126351967489 |
| 40 | D6: Effortfulness | D5: Cognitive trouble | 0.0844163690654091 |

**Table s8.** Unstandardized In-EI and Out-EI for All Nodes (Female Subsample)

|  | Out-EI | In-EI |
| --- | --- | --- |
| A1: Dressing | 0.905726830218107 | 0.468182372139251 |
| A2: Bathing | 0.443377691636905 | 0.578503578490519 |
| A3: Eating | 0.21681647596139 | 0.156143055151203 |
| A4: Getting up | 0.865014663473774 | 0.408173611059702 |
| A5: Toiletin | 0.302532020356138 | 0.388063340269945 |
| A6: Controlling elimination | 0.893431576950424 | 0.19760570304697 |
| A7: Housework | 0.467472071131554 | 0.531490979303265 |
| A8: Cooking | 0.864997171119205 | 0.423102280296886 |
| A9: Shopping | 0.803115079065085 | 0.421460586417468 |
| A10: Phone use | 0.427225630888526 | 0.195671164457241 |
| A11: Medication | 0.225664361923415 | 0.316115729153649 |
| A12: Money management | 0.591927217092362 | 0.338249041489531 |
| D1: depressiveness | 0.443783288012919 | 0.604425801714464 |
| D2: loneliness | 0.386312322264268 | 0.642872990652707 |
| D3: botheredness | 0.130009744412512 | 0.512894720187777 |
| D4: fearfulness | 0.353104015013866 | 0.583812799403345 |
| D5: cognitive trouble | 0.161536555818149 | 0.663617220243381 |
| D6: effortfulness | 0.552148690202452 | 0.90712338492856 |
| D7: inertia | 0.304085805456734 | 1.04030376666597 |
| D8: restlessness | 0.309750749087456 | 0.365331763819946 |
| D9: hopelessness | 0.309583904235735 | 0.127330762646876 |
| D10: unhappiness | 0.507199877756628 | 0.594341090538947 |

**Table s9.** Unstandardized In-EI and Out-EI for All Nodes (Male Subsample)

|  | Out-EI | In-EI |
| --- | --- | --- |
| A1: Dressing | 0.753180462155119 | 0.41903655555328 |
| A2: Bathing | 0.988427088804421 | 0.540068048570464 |
| A3: Eating | -0.226780107 | 0.257178908429809 |
| A4: Getting up | 0.548028881669315 | 0.305463593456282 |
| A5: Toiletin | 0.391690759138974 | 0.384048737973317 |
| A6: Controlling elimination | 0.523964705549814 | 0.322063049361501 |
| A7: Housework | 1.35242221401454 | 0.571217611983794 |
| A8: Cooking | 0.635112393523652 | 0.608935663877543 |
| A9: Shopping | 1.00624779465349 | 0.36379336996491 |
| A10: Phone use | 0.15877600789232 | 0.103570853108664 |
| A11: Medication | 0.821582521078592 | 0.201411957568036 |
| A12: Money management | 1.34059647196113 | 0.286024689372577 |
| D1: depressiveness | 0.288780023019535 | 0.964475912996949 |
| D2: loneliness | 0.340182450768907 | 0.905299465096029 |
| D3: botheredness | 0.3056519416738 | 0.675112032770145 |
| D4: fearfulness | 0.133468868185217 | 0.258325560039321 |
| D5: cognitive trouble | 0.382954529360889 | 0.685841280900578 |
| D6: effortfulness | 0.569974742488396 | 1.1584578570069 |
| D7: inertia | 0.417514434259489 | 0.814135238080207 |
| D8: restlessness | 0.206326291049224 | 0.371152408862664 |
| D9: hopelessness | 0.159787012086947 | 0.47881462931758 |
| D10: unhappiness | 0.455735268786759 | 0.879197330599301 |

| 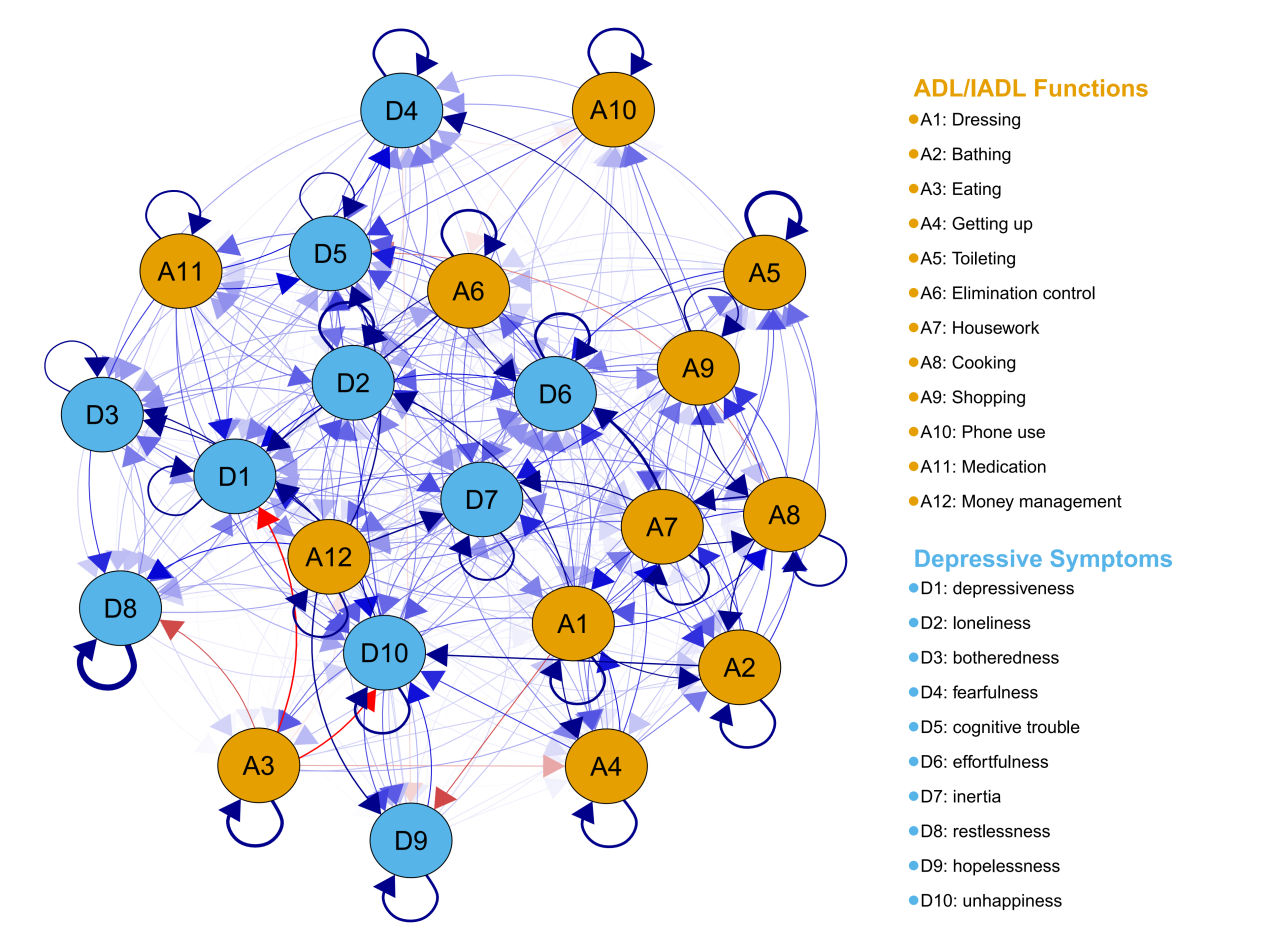 |
| --- |
| **Figure s1.** Cross-lagged panel network including autoregressive paths for all variables in the total sample (N=5850).  Note: The relationship between symptoms is indicated by the arrow’s color (blue = positive, red = negative), and the strength of the relationship is indicated by the arrow’s thickness (thicker = stronger). This figure displays the complete model, with solid arrows representing cross-lagged effects and circular arrows (or arrows pointing back to the same node) representing autoregressive effects (i.e., a variable’s prediction of itself over time). |

| 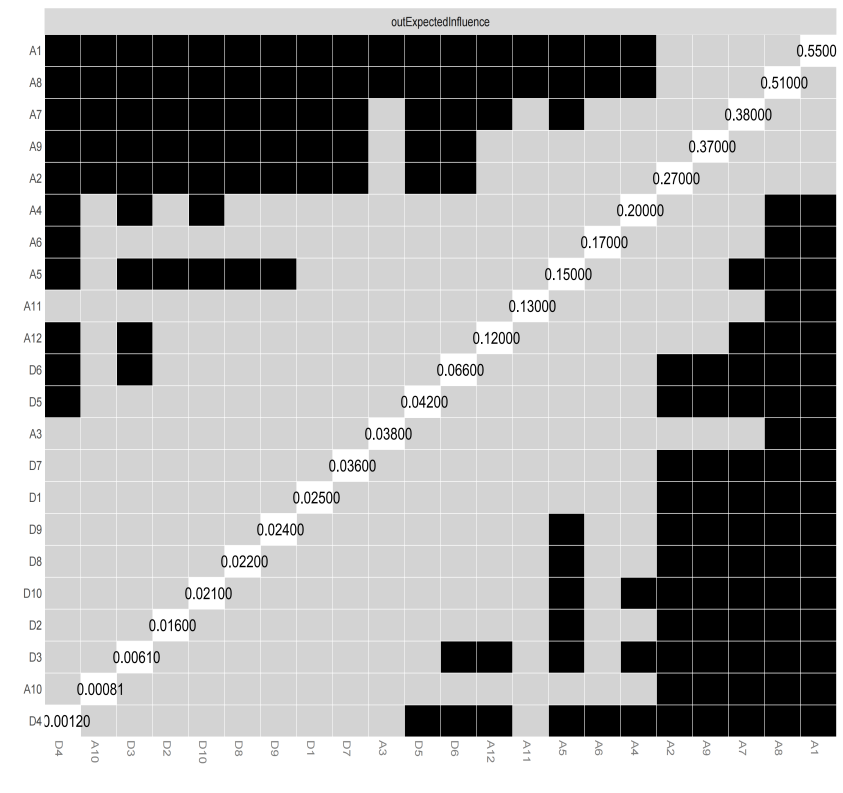 |
| --- |
| **Figure s2.** In-expected-influence difference tests for ADL and CESD-10 network in Chinese older adults with black boxes indicating edges that significantly differ from each other (*p* < .05) and gray boxes indicating no differences. |

| 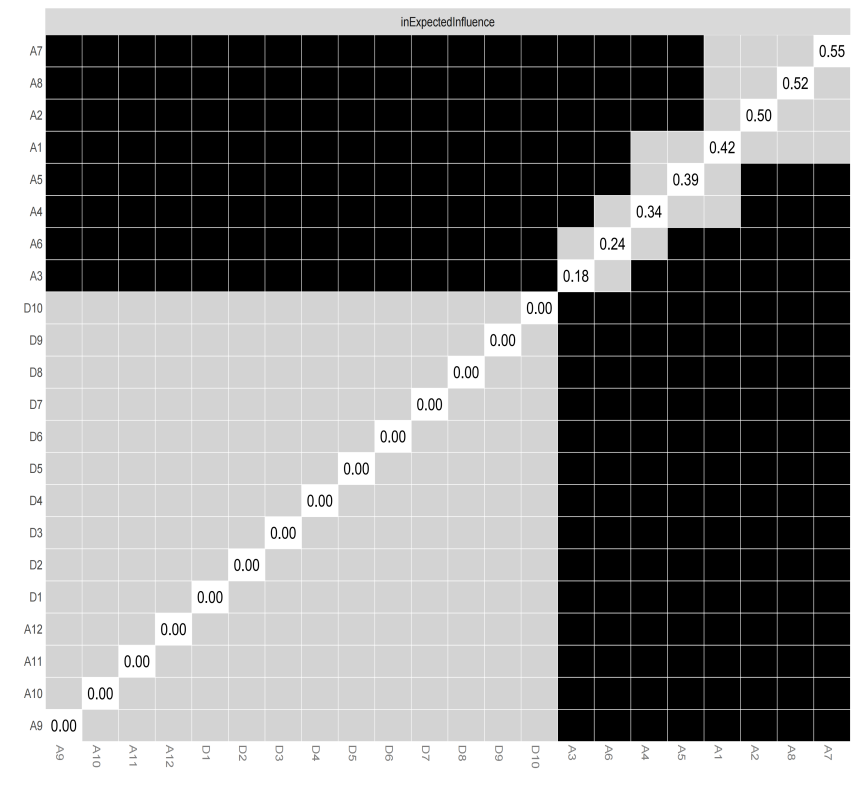 |
| --- |
| **Figure s3.** Out-expected-influence difference tests for ADL and CESD-10 network in Chinese older adults with black boxes indicating edges that significantly differ from each other (*p* < .05) and gray boxes indicating no differences. |

| 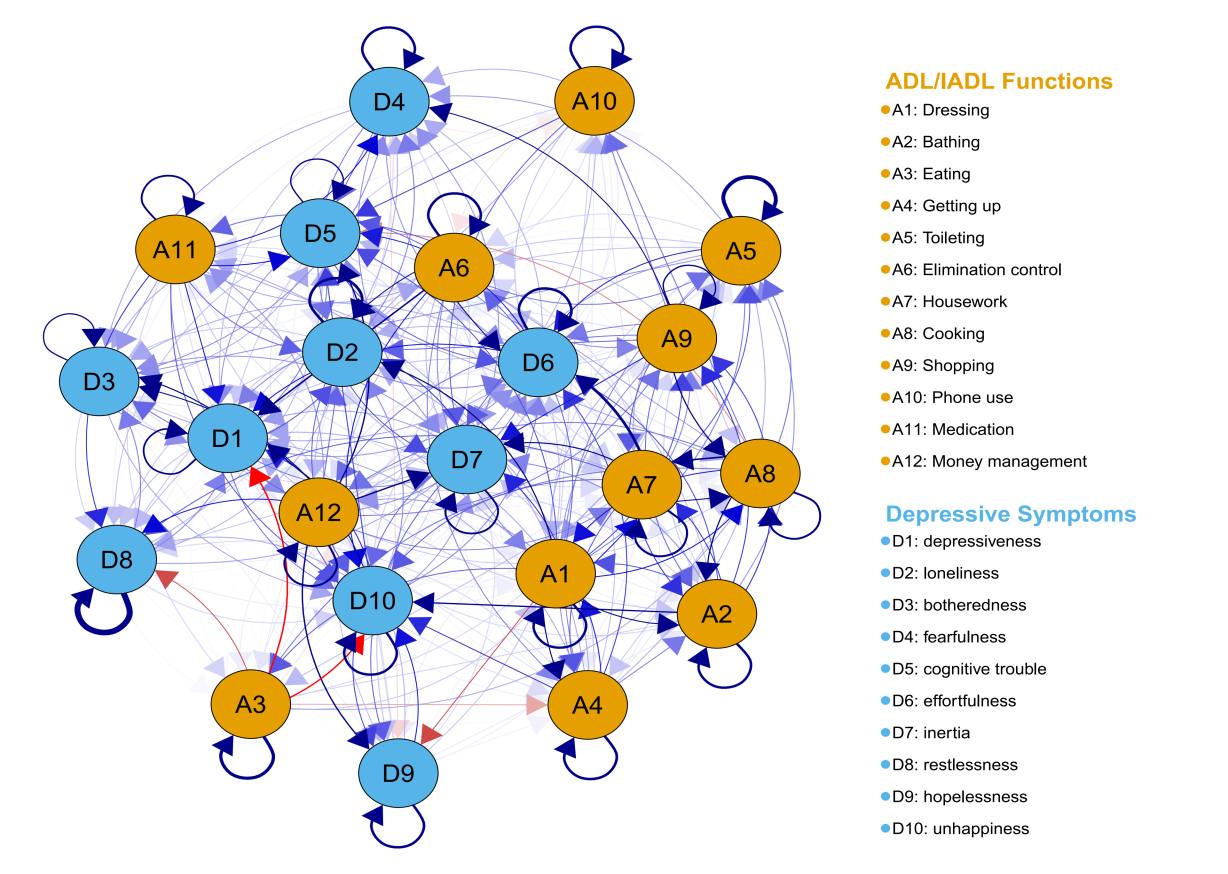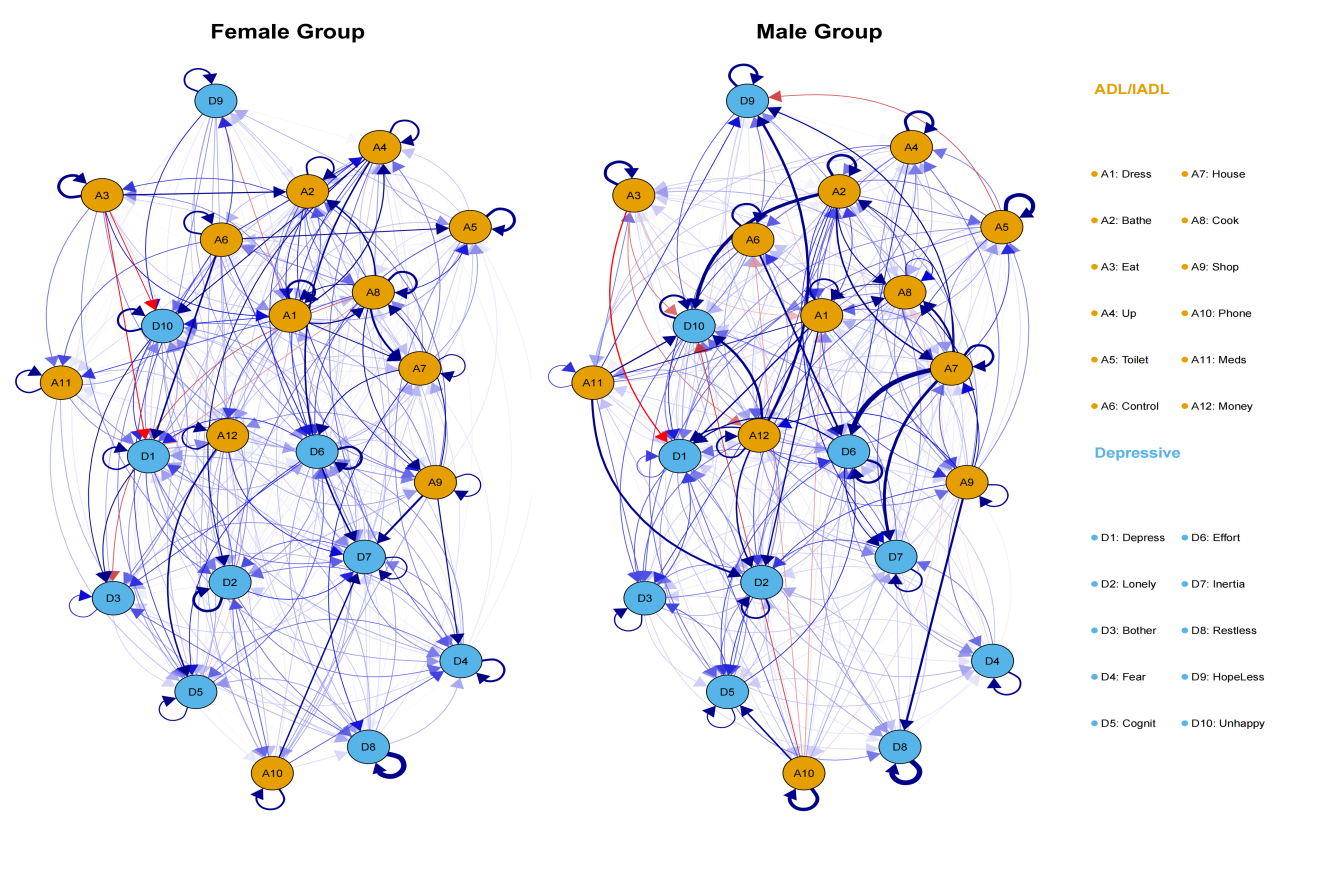 |
| --- |
| **Figure s4.** Cross-lagged panel networks including autoregressive paths for all variables in the female (left) and male (right) subsamples.  Note: The relationship between symptoms is indicated by the arrow’s color (blue = positive, red = negative), and the strength of the relationship is indicated by the arrow’s thickness (thicker = stronger). This figure displays the complete model, with solid arrows representing cross-lagged effects and circular arrows (or arrows pointing back to the same node) representing autoregressive effects (i.e., a variable’s prediction of itself over time). |

| 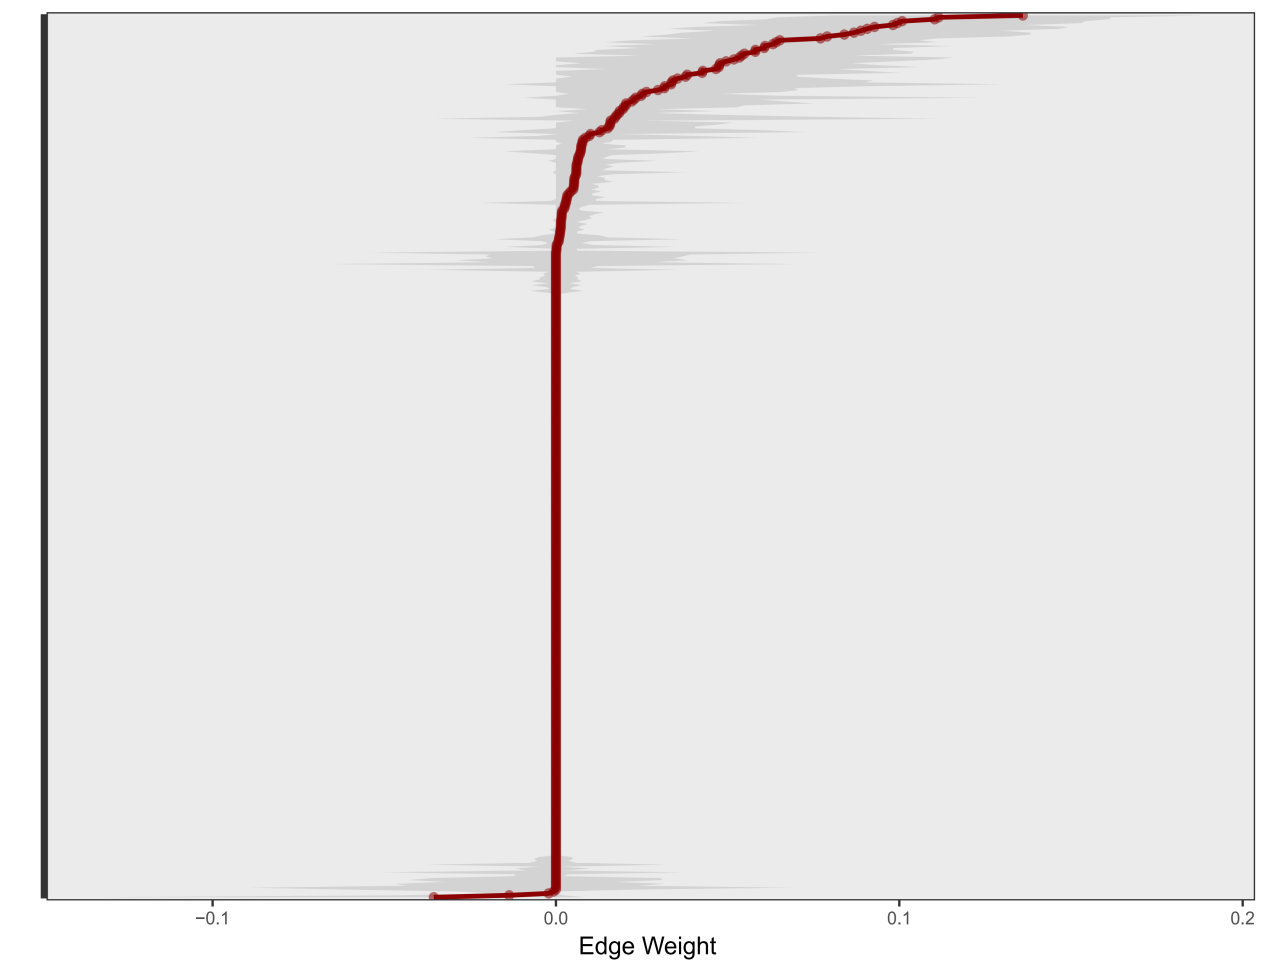 |
| --- |
| **Figure s6.** Accuracy of edge weights in the ADL-depression cross-lagged panel network for the total sample of Chinese older adults (N=5850). The plot shows the sample interrelations (i.e., edge weights; red dots), the means of the bootstrapped interrelations (i.e., edge weights; black dots), and the gray area represents the 95% Confidence Intervals of edge weights. |

| 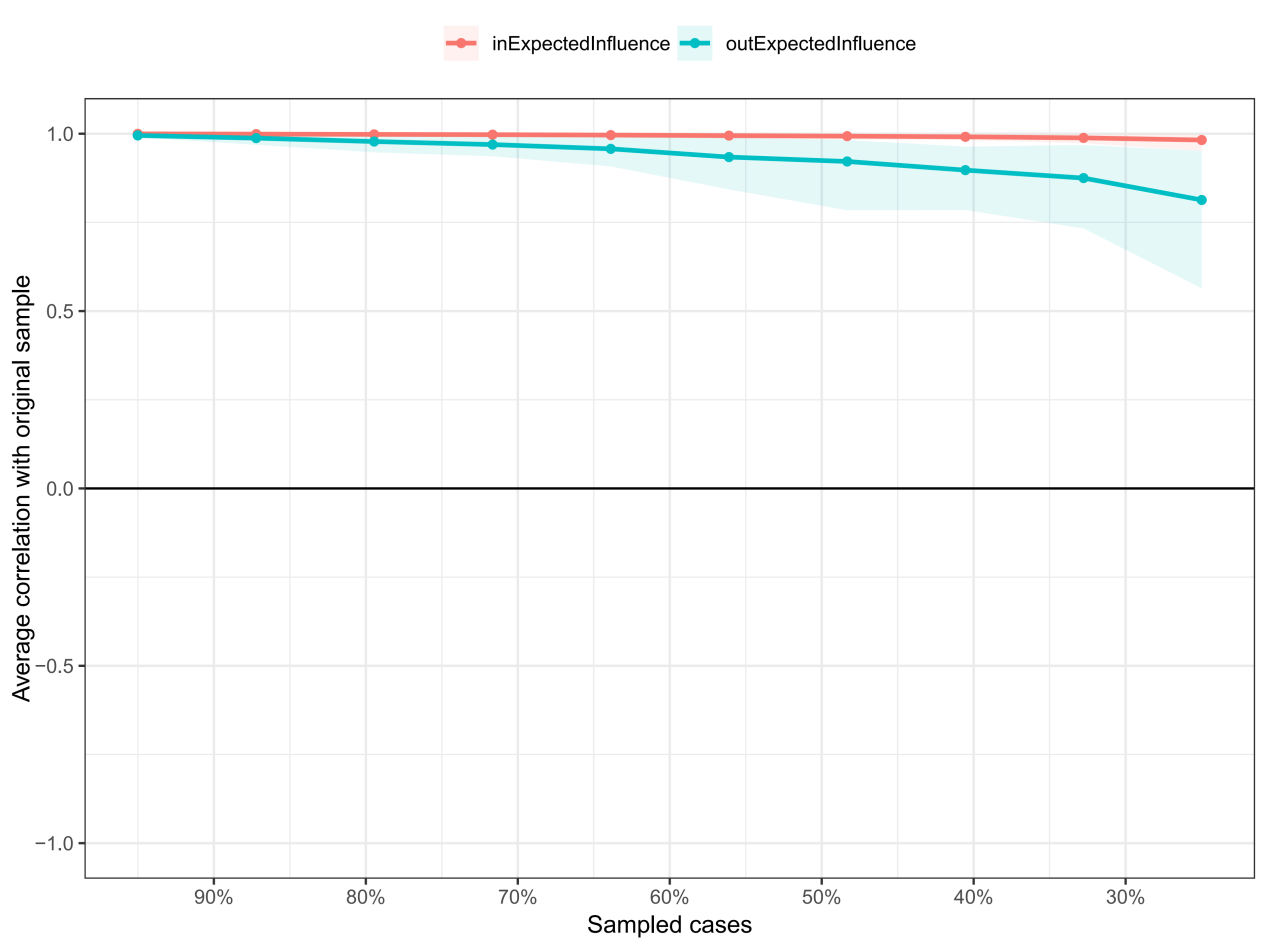 |
| --- |
| **Figure s7.** Stability of centrality measures for ADL and CESD-10 network in Chinese older adults. Lines indicate the means and areas indicate the range from the 2.5th quantile to the 97.5th quantile. |

| 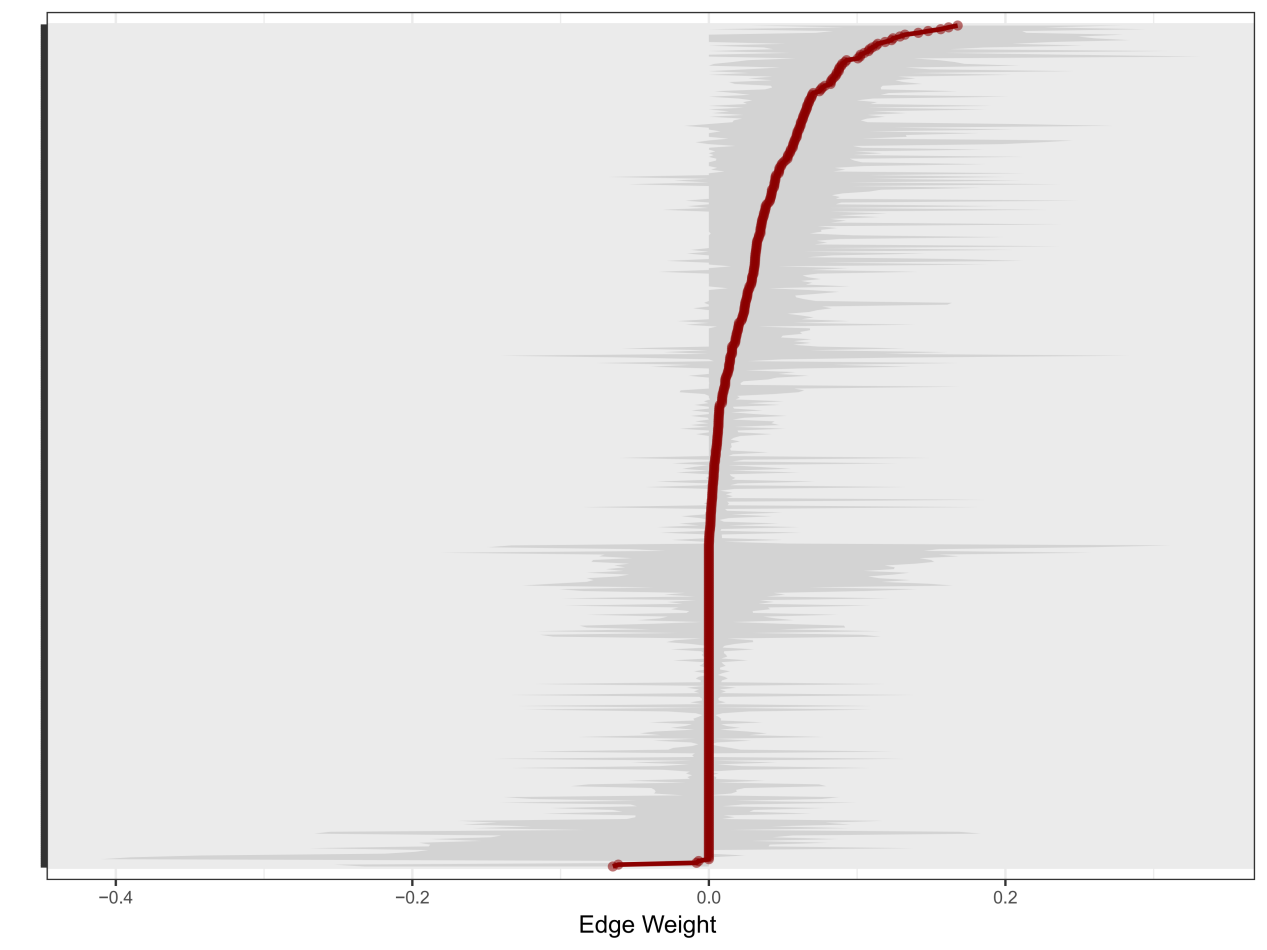 |
| --- |
| **Figure s8.** Accuracy of edge weights in the ADL-depression cross-lagged panel network for the female subsample of Chinese older adults (N=3038). The plot shows the sample interrelations (i.e., edge weights; red dots), the means of the bootstrapped interrelations (i.e., edge weights; black dots), and the gray area represents the 95% Confidence Intervals of edge weights. |

| 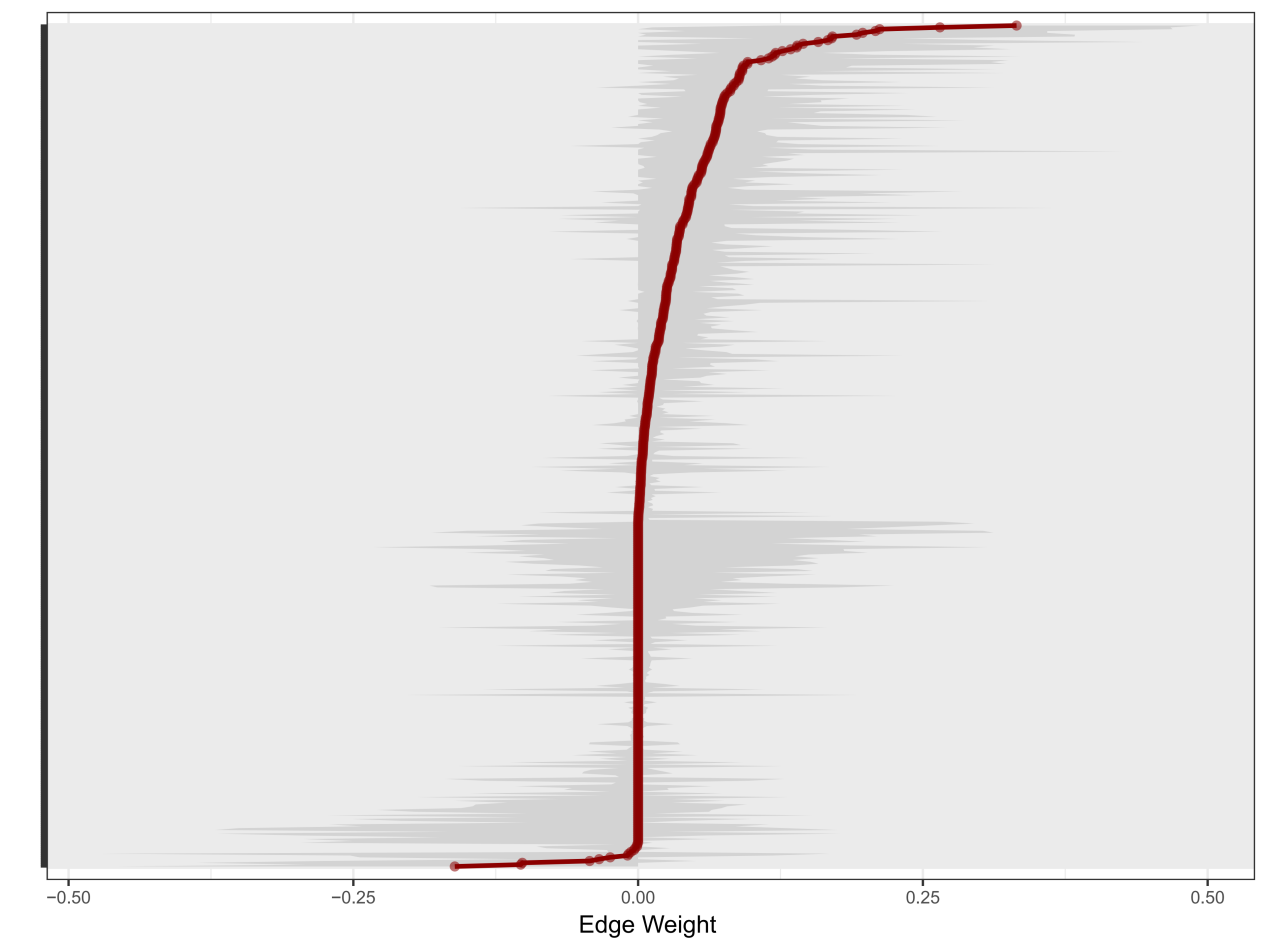 |
| --- |
| **Figure s9.** Accuracy of edge weights in the ADL-depression cross-lagged panel network for the male subsample of Chinese older adults (N=2812). The plot shows the sample interrelations (i.e., edge weights; red dots), the means of the bootstrapped interrelations (i.e., edge weights; black dots), and the gray area represents the 95% Confidence Intervals of edge weights. |

| 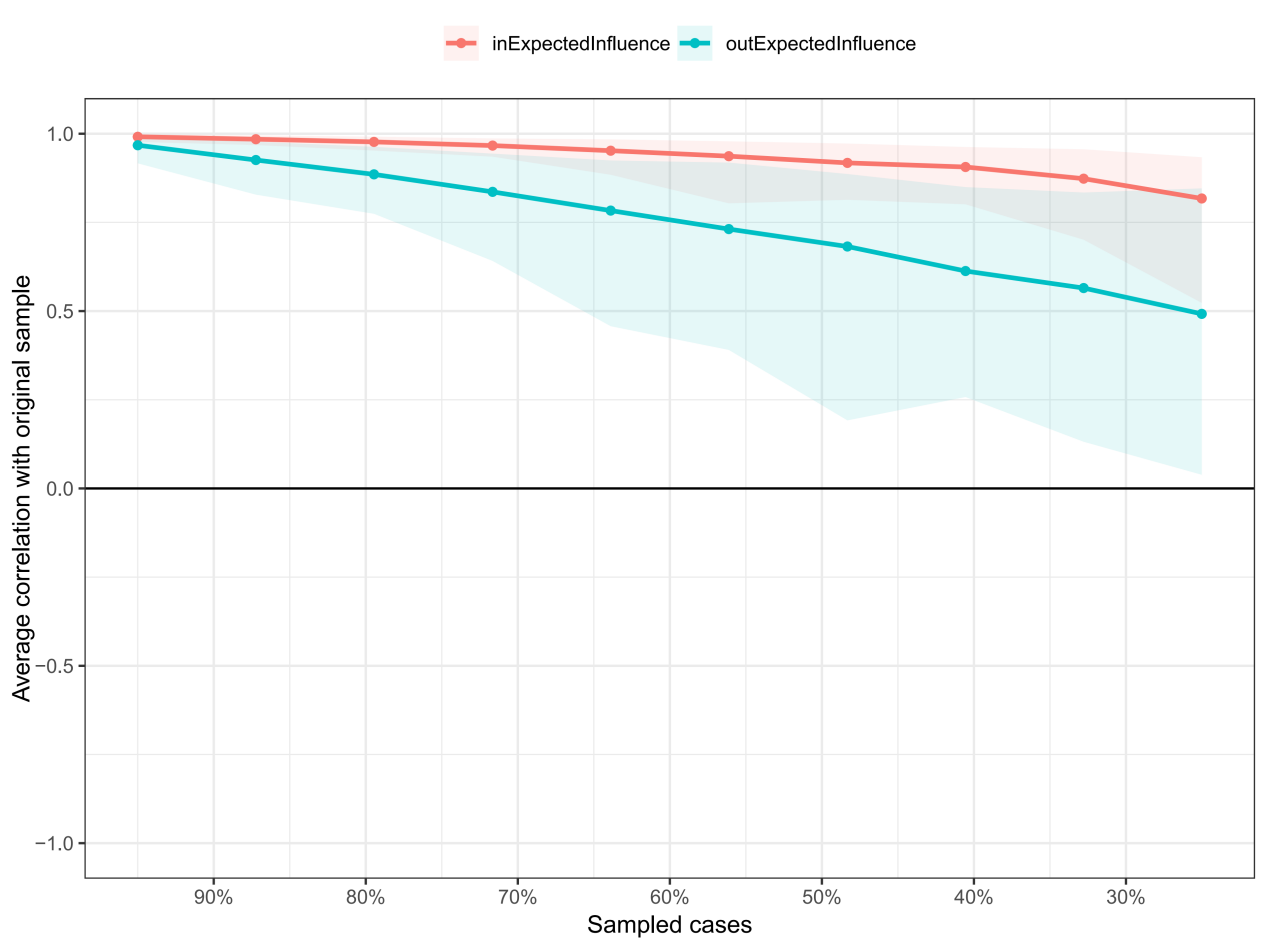 |
| --- |
| **Figure s10.** Stability of centrality measures for ADL and CESD-10 network in Chinese female older adults.. Lines indicate the means and areas indicate the range from the 2.5th quantile to the 97.5th quantile. |

| 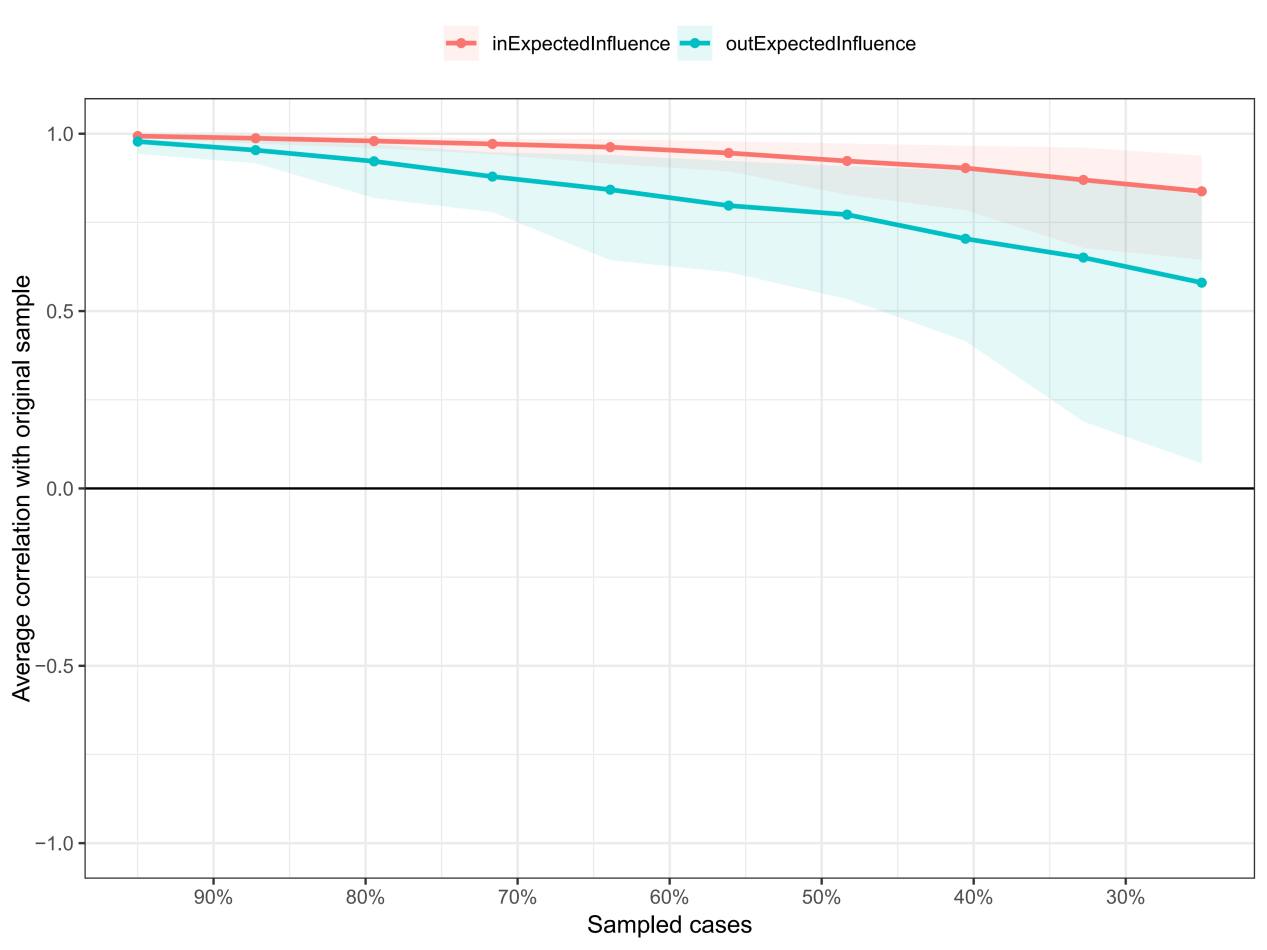 |
| --- |
| **Figure s11.** Stability of centrality measures for ADL and CESD-10 network in Chinese male older adults.. Lines indicate the means and areas indicate the range from the 2.5th quantile to the 97.5th quantile. |

| 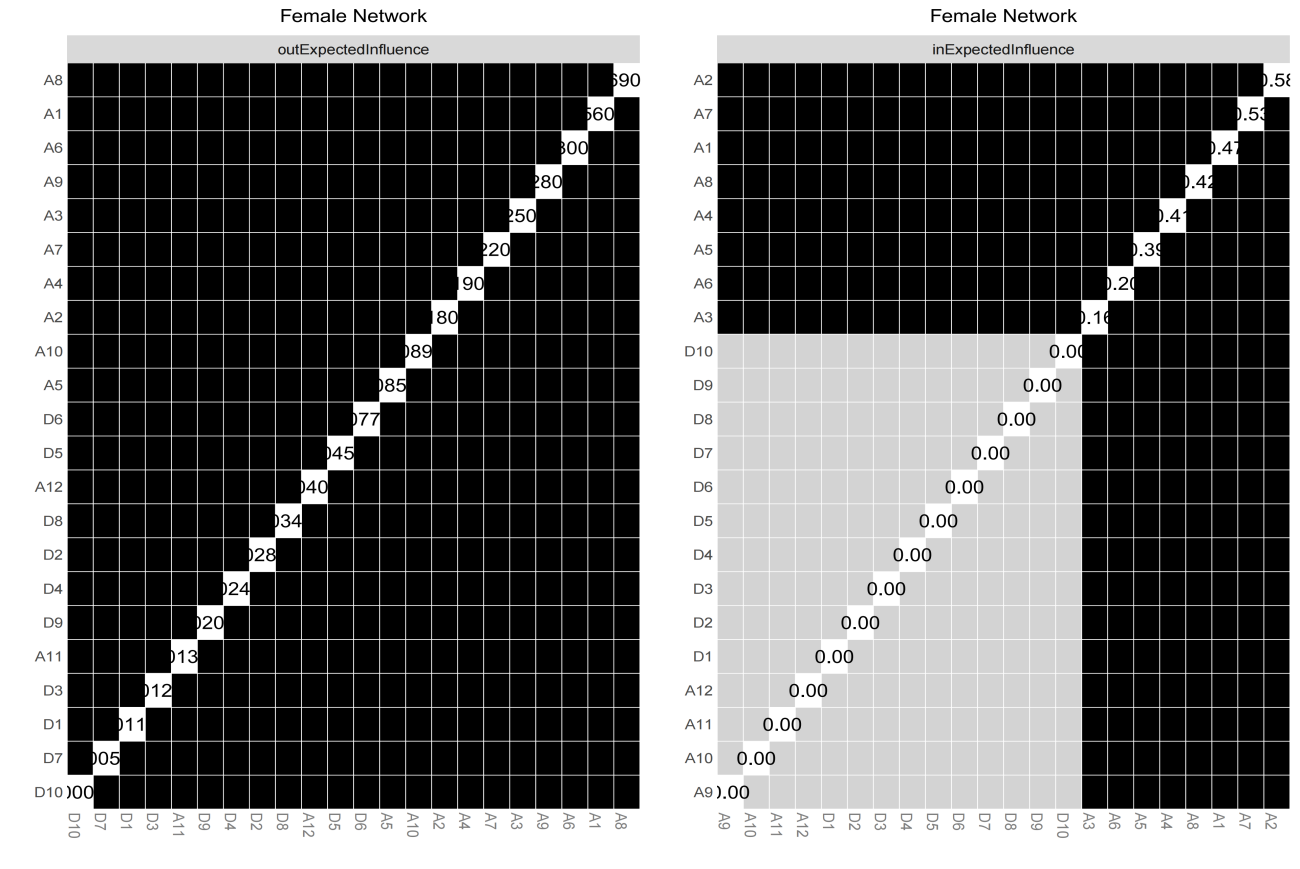 |
| --- |
| **Figure s12**.Out-expected-influence difference tests for ADL and CESD-10 network in Chinese female older adults with black boxes indicating edges that significantly differ from each other (*p* < .05) and gray boxes indicating no differences. |
| 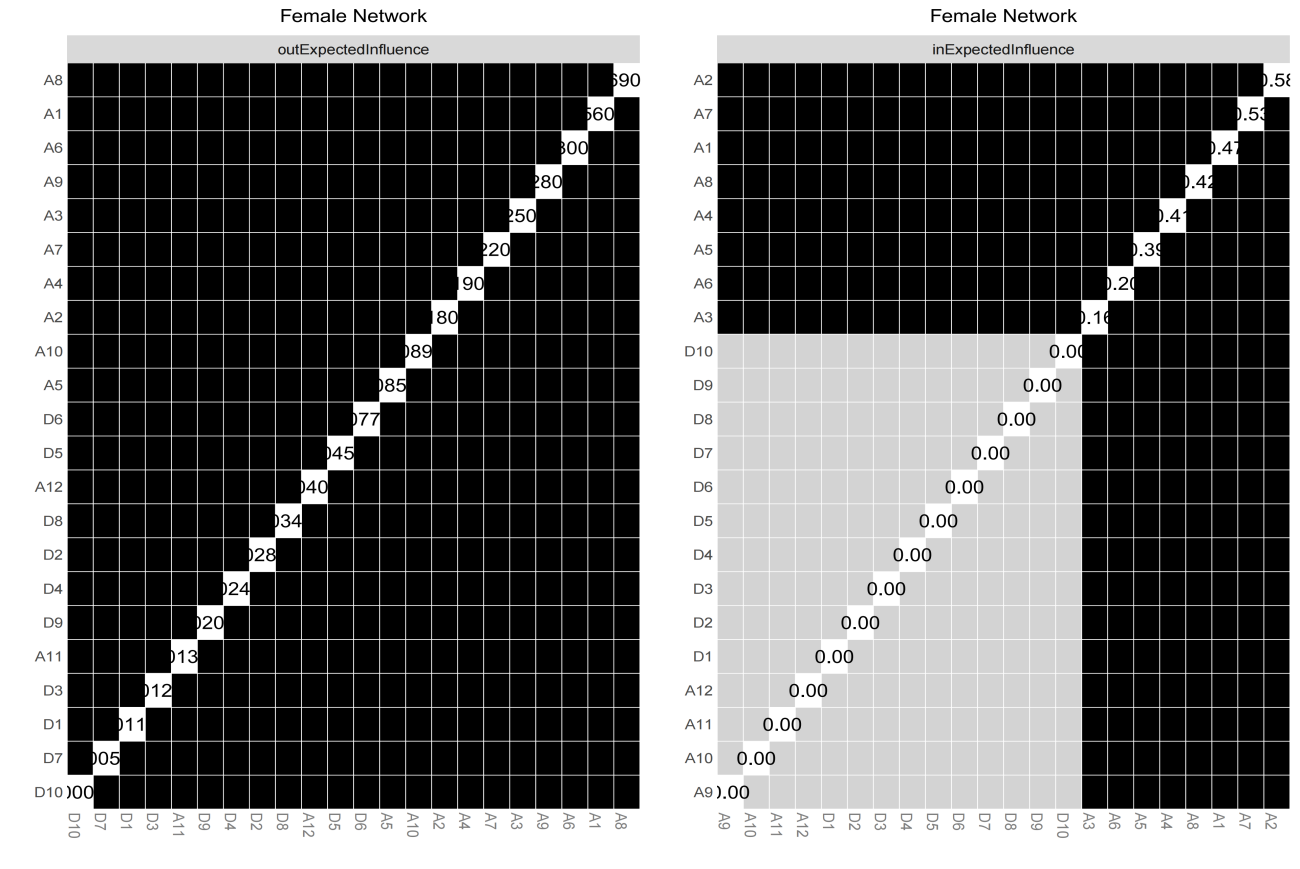 |
| **Figure s13**.In-expected-influence difference tests for ADL and CESD-10 network in Chinese female older adults with black boxes indicating edges that significantly differ from each other (*p* < .05) and gray boxes indicating no differences. |

| 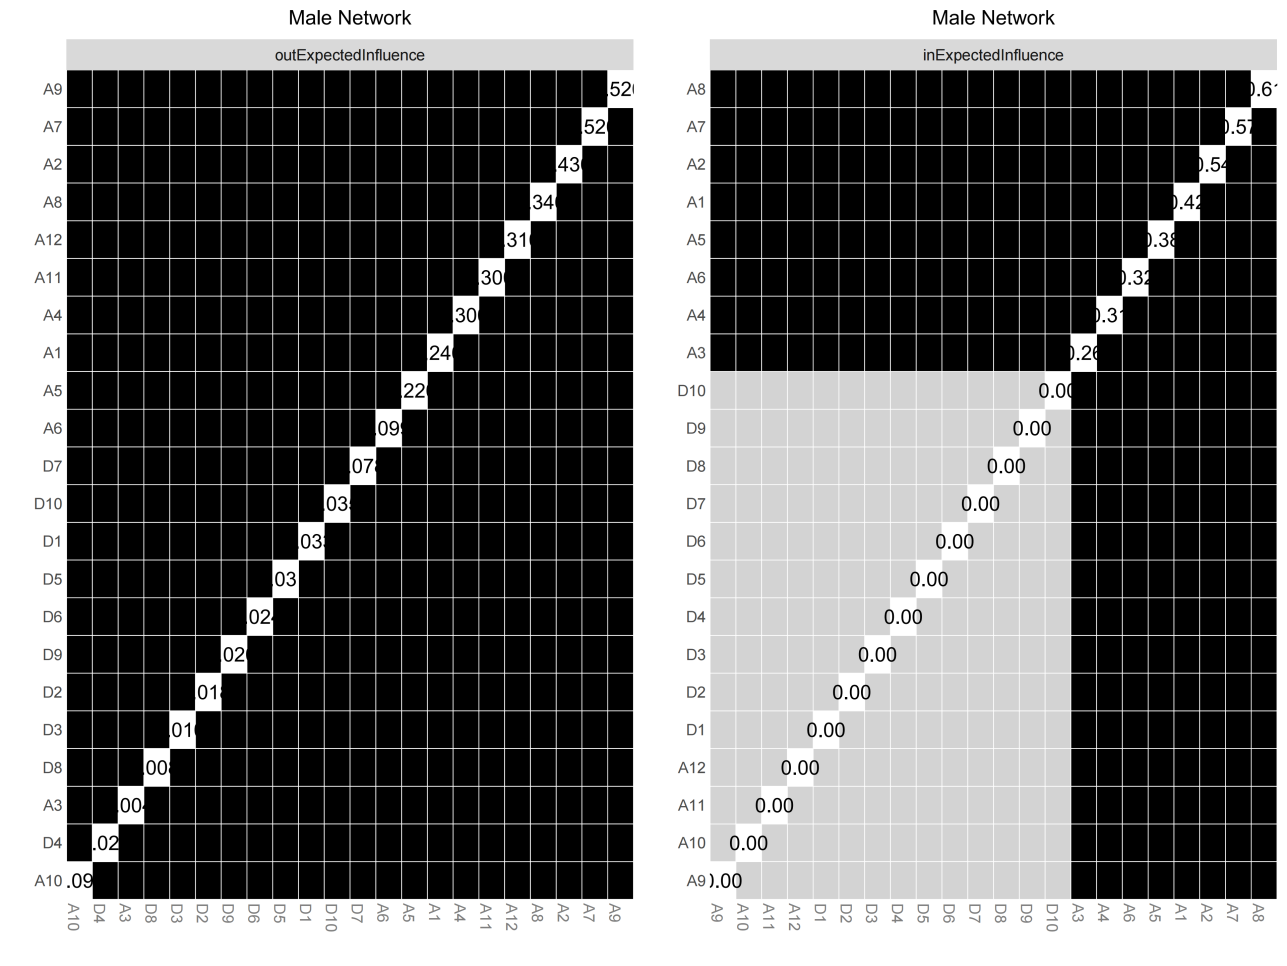 |
| --- |
| **Figure s14**.Out-expected-influence difference tests for ADL and CESD-10 network in Chinese male older adults with black boxes indicating edges that significantly differ from each other (*p* < .05) and gray boxes indicating no differences. |

| 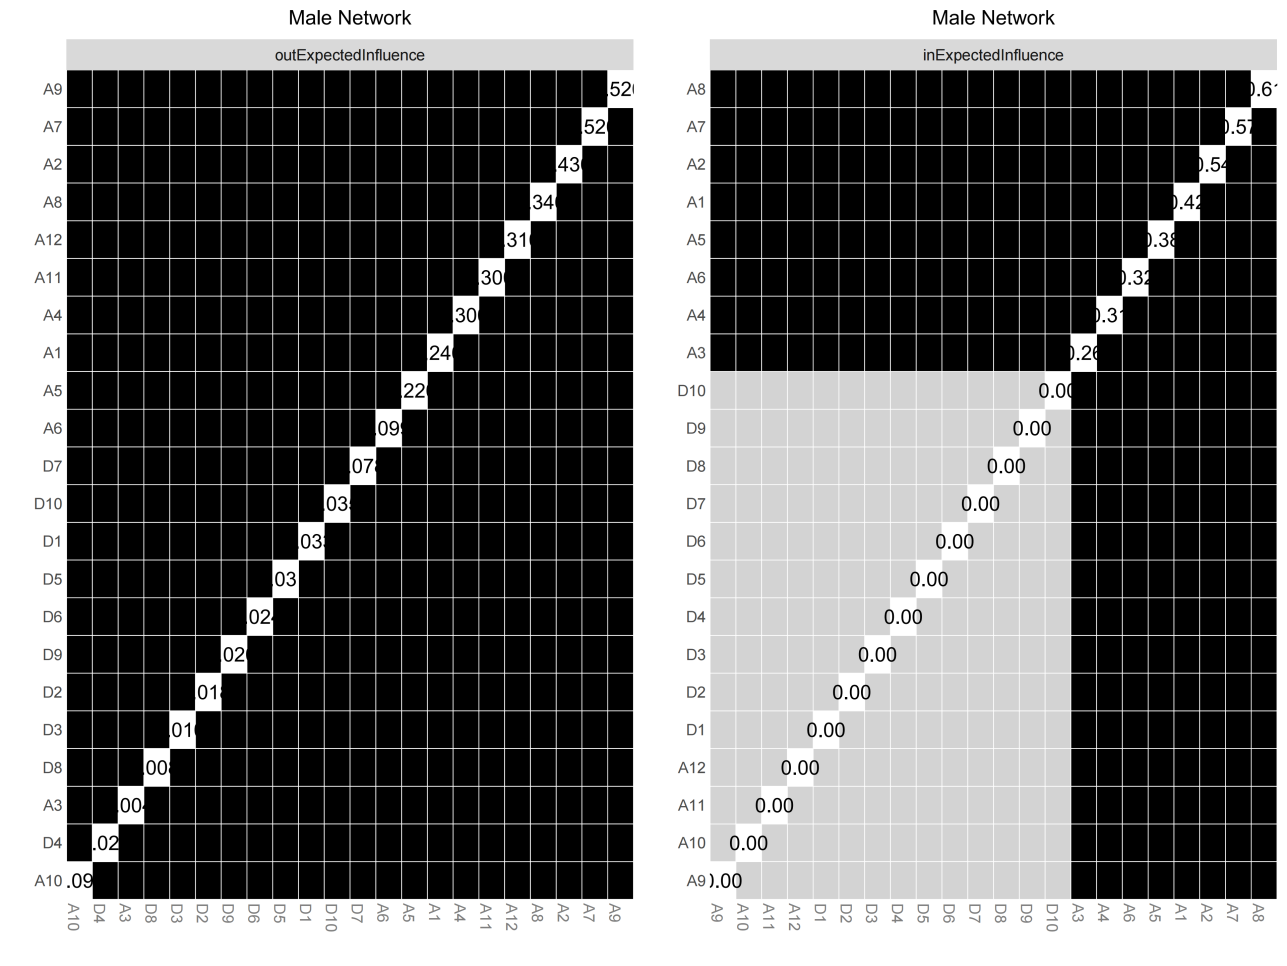 |
| --- |
| **Figure s15**.In-expected-influence difference tests for ADL and CESD-10 network in Chinese male older adults with black boxes indicating edges that significantly differ from each other (*p* < .05) and gray boxes indicating no differences. |
